# Supplementary material for: Functional Characterization of a Familial ALS-Associated Missense TBK1 (p-Arg573Gly) Mutation in Patient-Derived Lymphoblasts
Source: MDPI journal article supplement (doi:10.3390/ijms24032847), 2023-02-02
Supplement: s1 [file s1]

A

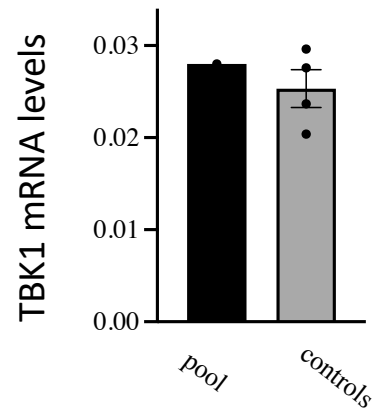

B

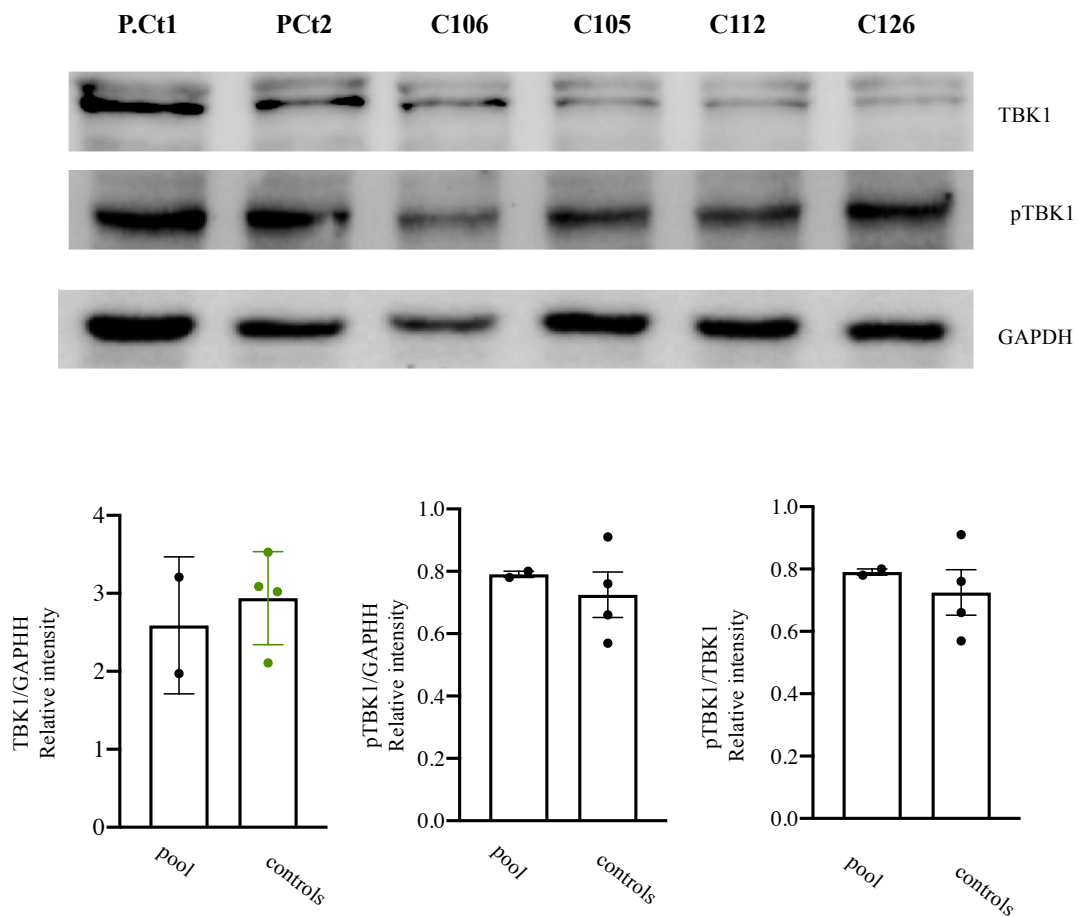

**Supplementary Figure S1. TBK1 expression levels in human lymphoblasts.**

Lymphoblasts from four control subjects were incubated individually or pooled at the initial density of  $1 \times 10^6$  cells  $\times$  ml<sup>-1</sup> in RPMI medium containing 10%FBs for 24 h. Then cells were harvested to isolate RNA and to prepare extracts for WB. A) TBK1mRNA levels were analyzed by quantitative RT-PCR. Data represent the mean  $\pm$  SEM. B) TBK1 protein content. Densitometric analysis are the mean  $\pm$  SEM. P.Ct1 and P.Ct2 are two doferent preparations of pooled control cell lines
